# Supplementary material for: Total Atherosclerosis Burden of Baroreceptor-Resident Arteries Independently Predicts Blood Pressure Dipping in Patients With Ischemic Stroke
Source: PubMed Central journal article supplement — Hypertension. 2020 Apr 27;75(6):1505–12. doi: 10.1161/HYPERTENSIONAHA.120.15036 (PMC7682798; doi:10.1161/hypertensionaha.120.15036), 2020-04-27
Supplement: hyp-75-1505-s004.pdf [file hyp-75-1505-s004.pdf]

## Change of Authorship Form

(Must be completed and signed by ALL authors)

Please check all that apply

New author(s) have been added (in addition to this form, all new authors must complete the copyright transfer agreement and conflict of interest disclosure.

Change in order of authorship.

An author wishes to remove his/her name. An author's name may only be removed his/her own request and a letter signed by the author should accompany this form

Manuscript Number HYPE202015036

Manuscript Title Total atherosclerosis burden of baroreceptor-resident arteries independently predicts blood pressure dipping in patients with ischemic stroke

### Former Authorship

Please list ALL AUTHORS in the same order as the original submission. For more than 12, use an extra sheet.

#### Print Name

Name (1) Qi Kong  
 Name (2) Xin Ma  
 Name (3) Chen Wang  
 Name (4) Xiangying Du  
 Name (5) Yungao Wan  
 Name (6) \_\_\_\_\_

#### Print Name

Name (7) \_\_\_\_\_  
 Name (8) \_\_\_\_\_  
 Name (9) \_\_\_\_\_  
 Name (10) \_\_\_\_\_  
 Name (11) \_\_\_\_\_  
 Name (12) \_\_\_\_\_

### New Authorship

All authors must sign below agreeing to the changes in authorship. The authorship order must reflect the authorship order of the manuscript.

|                              |                               |                       |
|------------------------------|-------------------------------|-----------------------|
| Name (1) <u>Qi Kong</u>      | Signature <u>Qi Kong</u>      | Date <u>2020/3/23</u> |
| Name (2) <u>Xin Ma</u>       | Signature <u>Xin Ma</u>       | Date <u>2020-3-23</u> |
| Name (3) <u>Chen Wang</u>    | Signature <u>Chen Wang</u>    | Date <u>2020-3-23</u> |
| Name (4) <u>Xiangying Du</u> | Signature <u>Xiangying Du</u> | Date <u>2020.3.23</u> |
| Name (5) <u>Yi Ren</u>       | Signature <u>Yi Ren</u>       | Date <u>2020-3-23</u> |
| Name (6) <u>Yungao Wan</u>   | Signature <u>Yungao Wan</u>   | Date <u>2020/3/23</u> |
| Name (7) _____               | Signature _____               | Date _____            |
| Name (8) _____               | Signature _____               | Date _____            |
| Name (9) _____               | Signature _____               | Date _____            |
| Name (10) _____              | Signature _____               | Date _____            |
| Name (11) _____              | Signature _____               | Date _____            |
| Name (12) _____              | Signature _____               | Date _____            |

Please print form and fax to 214-706-1565.
